# Supplementary material
Source: PubMed Central journal article supplement (PMC5703331)
Supplement: pnas.201716181SI.pdf [file pnas.201716181SI.pdf]

# Supporting Information

Gomes et al. 10.1073/pnas.1716181114

## SI Materials and Methods

**Mosquito Collection.** Mosquitoes were collected in the villages of Dangassa (12.14°N, 8.20°W) and Kenieroba (12.11°N, 8.33°W), southwest of Bamako, Mali, along the Niger River in May–January 2010–2011, October–November 2015, and July–August 2016 (Fig. 1). Houses were sprayed with pyrethrum, and female mosquitoes were captured and desiccated using Eppendorf tubes with silica gel.

**Homogenization of Samples for *Plasmodium* Detection by Anti-CSP ELISA and Genomic DNA Extraction.** Head-thorax segments were dissected and homogenates were prepared as described (42). Briefly, samples were homogenized with a plastic pestle in 50  $\mu$ L of blocking buffer (5% casein, 50 mM EDTA, PBS pH 7.4) (BB-EDTA), supplemented with 5% Nonidet P-40 (BB-Nonidet P-40). The pestle was rinsed by adding 200  $\mu$ L of BB-EDTA, bringing the final homogenate volume to 250  $\mu$ L. *Plasmodium* infection was detected using 50  $\mu$ L of the homogenate to detect the *P. falciparum* CSP using an anti-sporozoite monoclonal antibody with an ELISA kit (BEI Resources) with samples done in duplicate (100  $\mu$ L of total homogenate). The rest of the homogenate (150  $\mu$ L) was immediately frozen in dry ice and stored at  $-80^{\circ}\text{C}$ .

**Genomic DNA Extraction and Quantitation of *P. falciparum* and *Wolbachia* Infection in Field-Collected Mosquitoes.** Genomic DNA was extracted from 150  $\mu$ L of homogenate. The homogenates were incubated with 3 mg/mL proteinase K at  $56^{\circ}\text{C}$  for 1 h, and genomic DNA (gDNA) was purified using phenol/chloroform extraction, followed by two chloroform extractions. The aqueous layer was transferred to a new tube, 0.1 volumes of 0.3 M sodium acetate and 0.7 volumes of isopropanol were added, and DNA was precipitated by centrifugation (16,000  $\times g$  for 15 min). The pellet was gently washed twice with 100  $\mu$ L of 70% ethanol (16,000  $\times g$  for 5 min) and resuspended in 200  $\mu$ L of Tris-EDTA buffer. To further purify the DNA, samples were reprecipitated (with 0.1 volumes of 0.3 M sodium acetate and 0.7 volumes of isopropanol) and gently washed twice with 70% ethanol. DNA pellets were air-dried for 30–60 min and resuspended in 30  $\mu$ L of TE. *Wolbachia* was detected by PCR (forward: 5'-CATACTATTCGAAGGGATAG-3', reverse: 5'-AGCTTCGAGTGAAACCAATTC-3') (25) using the following amplification conditions: 10 min at  $95^{\circ}\text{C}$ , followed by 45 cycles of 45 s at  $95^{\circ}\text{C}$ , 45 s at  $60^{\circ}\text{C}$  and 1 min at  $72^{\circ}\text{C}$ , followed by 10 min at  $72^{\circ}\text{C}$ . Nested PCR was used to detect *Wolbachia* using *Wolbachia*-specific primers targeting 16S rRNA (forward: 5'-GAAGGGATAGGGTTCGGTTCG-3', reverse: 5'-CAATTCC-CATGGCGTGACG-3') under the following conditions: 15 min at  $95^{\circ}\text{C}$ , followed by 35 cycles of 15 s at  $95^{\circ}\text{C}$ , 25 s at  $66^{\circ}\text{C}$ , and 1 min at  $72^{\circ}\text{C}$ , followed by 5 min at  $72^{\circ}\text{C}$  (23). PCRs were performed using Taq DNA Polymerase, native kits (ThermoFisher) with 500 nM forward and reverse primers. The specificity of the PCRs was confirmed by Sanger sequencing.

***Wolbachia* Phylogenetic Analysis and MLST Typing.** For phylogenetic analysis, Rickettsiales-specific primers targeting a variable region of the 16S rRNA were used [forward: 5'-CAGACGGGTGAG-TAATG(C/T)ATAG-3', reverse: 5'-TATCACTGGCAGTTTC-CTTAAAG-3'] under the following conditions: 10 min at  $95^{\circ}\text{C}$ , followed by 45 cycles of 45 s at  $95^{\circ}\text{C}$ , 45 s at  $64^{\circ}\text{C}$  and 1 min at  $72^{\circ}\text{C}$ , followed by 5 min at  $72^{\circ}\text{C}$  (25). PCRs were performed using Taq DNA Polymerase, native kits (ThermoFisher) with 500 nM forward and reverse primers. Following Sanger sequencing, downstream analysis was performed using the Geneious R10 software

platform (Biomatters). Sequenced PCR products were blasted against the National Center for Biotechnology Information (NCBI) nucleotide database. The top 500 results were downloaded and manually inspected to remove redundancy. Reference *Rickettsia* sequences were added and sequence alignment was performed using the MUSCLE algorithm. A phylogenetic tree was reconstructed using a Tamura-Nei genetic distance model. For MLST typing, primer sequences and PCR conditions were used as instructed by the *Wolbachia* MLST Database (26). PCRs were performed using Taq DNA Polymerase, native kits (ThermoFisher) with 500 nM forward and reverse primers.

***Wolbachia* and *Plasmodium* Detection and by qPCR.** *Wolbachia* levels within mosquito genomic DNA samples were analyzed by SYBR green qRT-PCR. *Wolbachia*- and *Plasmodium*-specific primers against 16S (forward: 5'-CATACTATTCGAAGGGATAG-3', reverse: 5'-TTGCGGGACTTAACCCAACA-3') and 28S (forward: 5'-GTGGCCTATCGATCCTTTA-3', reverse: 5'-GCG-TCCCAATGATAGGAAGA-3') rRNA were used, respectively. The amount of gDNA template was normalized based on the levels of *A. gambiae* S7 rRNA gene in each sample (forward: 5'-GCGTCCCAATGATAGGAAGA-3', reverse: 5'-GCTGCAA-ACTTCGGCTATTC-3'). The PCRs were performed under the following conditions: 15 min at  $95^{\circ}\text{C}$ , followed by 45 cycles of 15 s at  $94^{\circ}\text{C}$ , 20 s at  $60^{\circ}\text{C}$  and 30 s at  $72^{\circ}\text{C}$ , followed by 5 min at  $72^{\circ}\text{C}$ . PCRs were performed using DyNAmo HS SYBR Green qPCR Kit (ThermoFisher) with 300 nM forward and reverse primers using a CFX96 system (Bio-Rad). gDNA isolated from females of the NIH *A. gambiae* G3 colony, that is not infected with *Wolbachia*, was used as positive and negative control for the qPCR assays. Amplification of the *A. gambiae* S7 gene was confirmed, as well as the lack of *Wolbachia* amplification. Cycles threshold (Ct) values beyond 40 cycles were considered as negative, and the limit of detection was set at a point where the correlation between technical replicates was very high ( $R^2 = 0.9978$ ,  $P < 0.0001$ ).

**Establishment of *Wolbachia*-infected *A. coluzzii* Colony.** Females were collected from Dangassa and allowed to lay eggs in individual containers. Eggs were allowed to hatch and mothers were genotyped as either *A. gambiae* (S molecular form) or *A. coluzzii* (M molecular form), as previously described (43). *A. coluzzii* larvae from 23 females were pooled and reared. Upon emergence, adult mosquitoes were mixed for three generations with *A. coluzzii* males from a colony kept at the Laboratory of Malaria and Vector Research, NIH. Mosquitoes were treated with Penicillin-Streptomycin (Sigma-Aldrich), because some bacteria from the microbiota, such as *Asaia*, have been reported to reduce vertical transmission of *Wolbachia* anophelines (44). Briefly, mosquitoes received 100 units/mL Penicillin and 100  $\mu\text{g/mL}$  Streptomycin in water for 2 d before and 2 d after blood feeding. Sucrose was provided as a dry sugar cube, and mosquitoes were allowed to lay eggs in a wet filter paper.

**Experimental Infection of Mosquitoes with *P. falciparum*.** Mosquito females were artificially infected by membrane feeding with *P. falciparum* NF54 gametocyte cultures. Gametocytogenesis was induced as previously described (45) and 14- to 16-d mature gametocyte cultures (stages IV and V) were used to feed mosquitoes using membrane feeders at  $37^{\circ}\text{C}$  for 30 min. *Wolbachia* and *Plasmodium* infection levels were analyzed by qPCR using dissected midgut or head-thorax gDNA samples 8–10 or 18–21 d after feeding, respectively. Midgut gDNA was extracted using





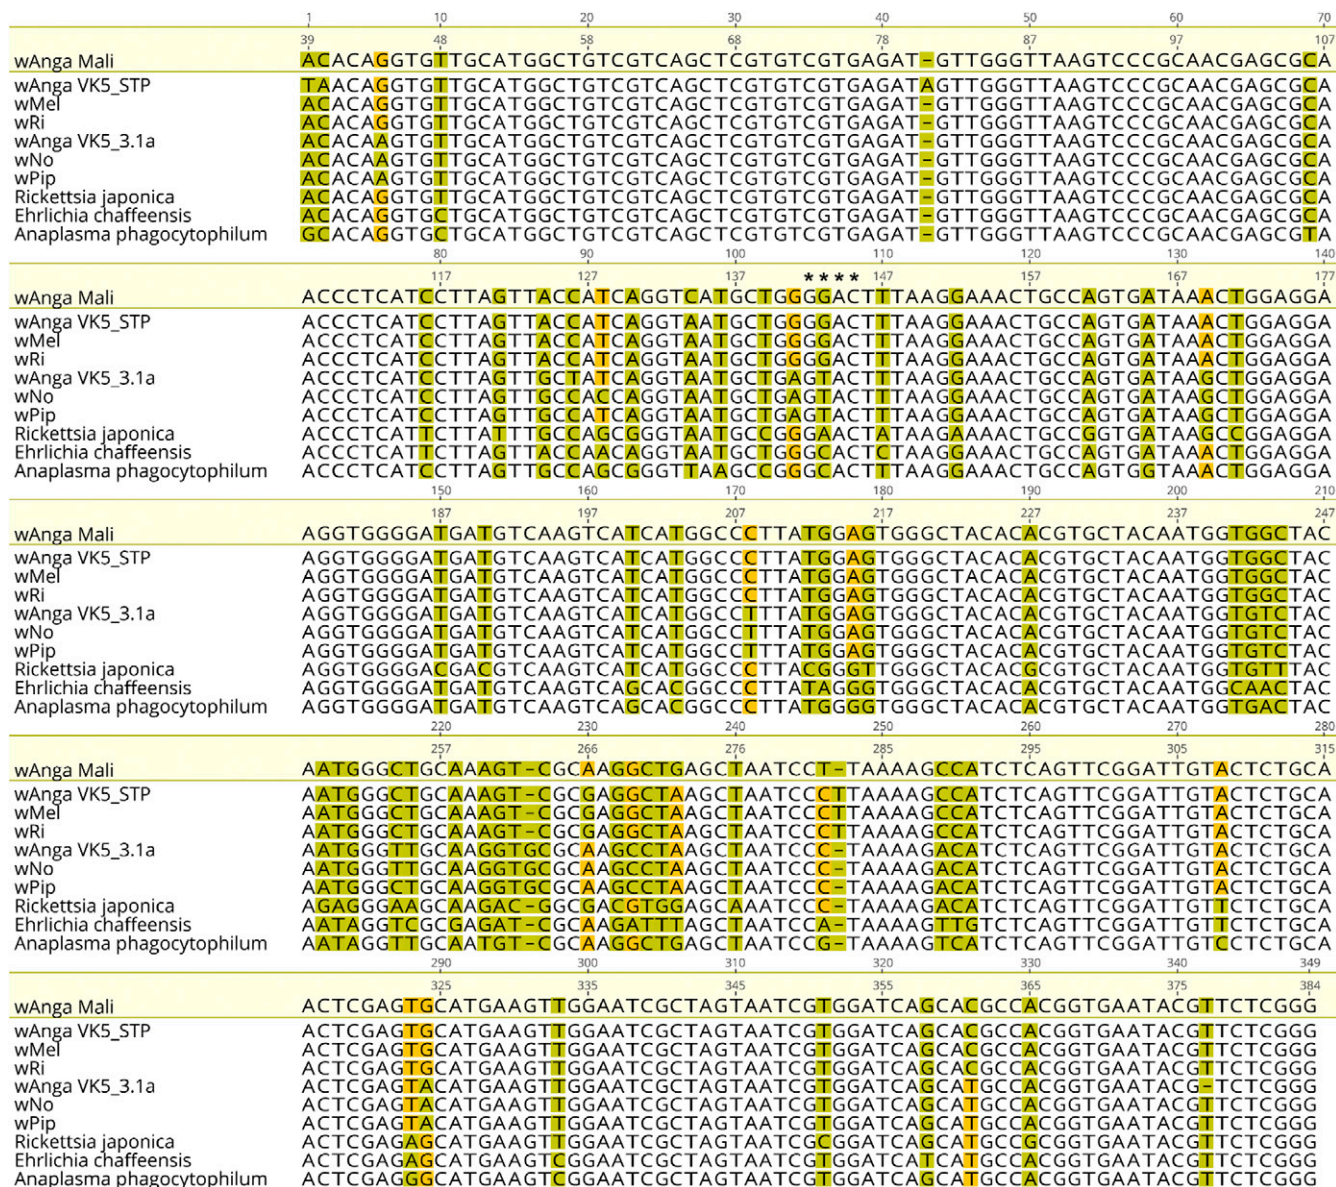

**Fig. 52.** Alignment of a conserved region of the 16S rRNA gene using *Wolbachia*-specific primers (W16S-Spec). Asterisks denotes the nucleotide residues that encode an *RsaI* restriction site, a signature feature of *Wolbachia* supergroup B.

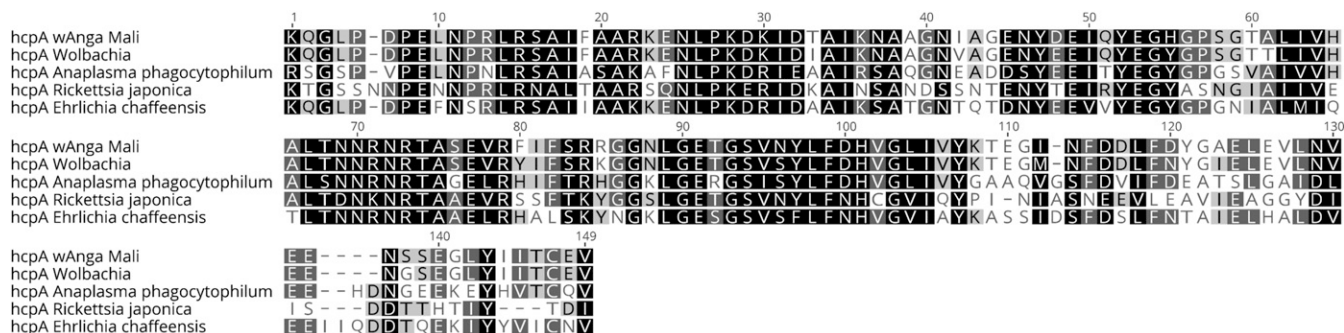

**Fig. 53.** Sequence alignment of the deduced amino acid sequence of the region of the *hcpA* gene from *Wolbachia* and other non-*Wolbachia* prebacterium. These sequences are used in the MLST scheme, a universal genotyping tool for *Wolbachia*.

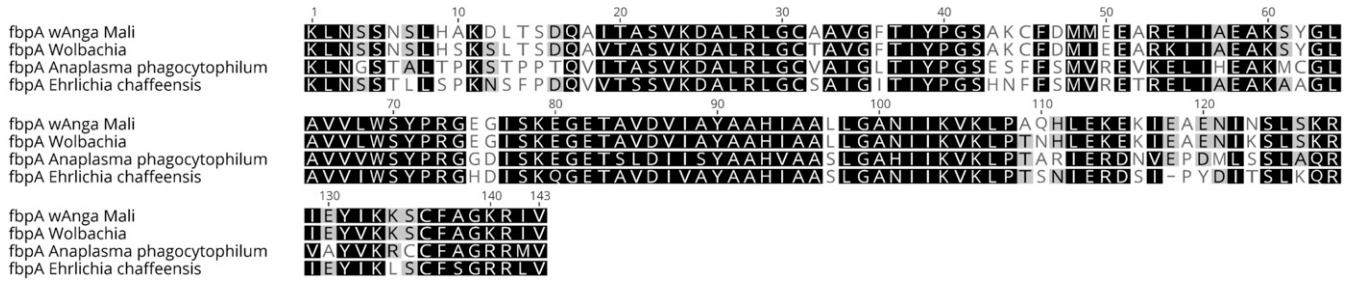

Fig. S4. Sequence alignment of the deduced amino acid sequence of the region of the *fbpA* gene from *Wolbachia* and other non-*Wolbachia* pre-tobacterium. These sequences are used in the MLST scheme, a universal genotyping tool for *Wolbachia*.

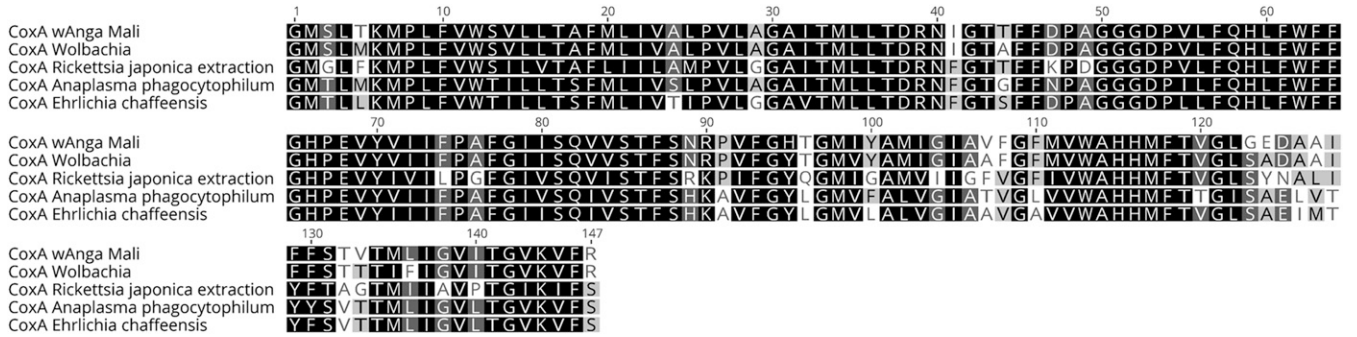

Fig. S5. Sequence alignment of the deduced amino acid sequence of the region of the *coxA* gene from *Wolbachia* and other non-*Wolbachia* pre-tobacterium. These sequences are used in the MLST scheme, a universal genotyping tool for *Wolbachia*.

### *Pf* sporozoites field-collected *A. coluzzii* (M Form)

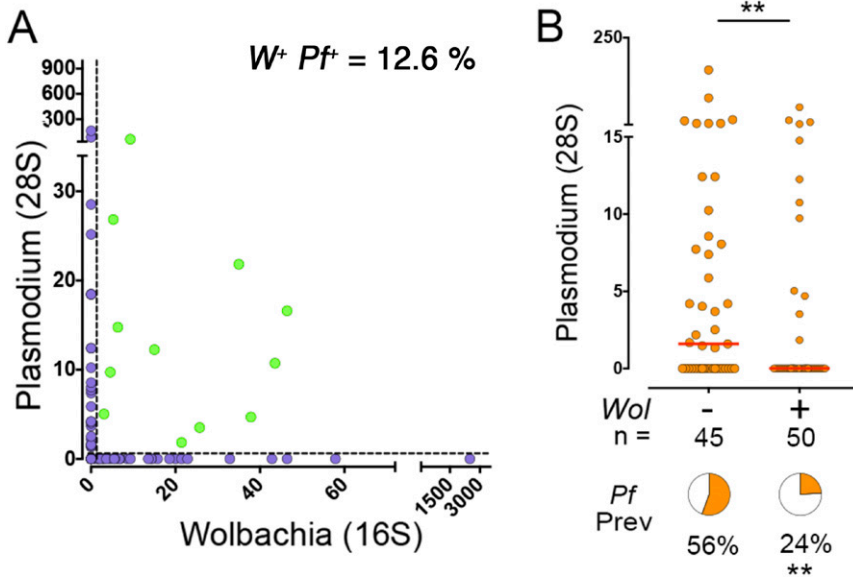

Fig. S6. Effect of naturally occurring *Wolbachia* infection on *Plasmodium* sporozoite infection in field-collected *A. coluzzii*. *Wolbachia* and *Plasmodium* levels in field-collected *A. coluzzii* were determined by qRT-PCR. (A) Correlation between *Wolbachia* and *Plasmodium* levels. The relative abundance of coinfecting mosquitoes ( $W^+ Pf^+$ ) is indicated. (B) Levels of *Plasmodium* sporozoite infection in *Wolbachia*-infected and uninfected females. Each data point represents the level of *Plasmodium* infection in a single mosquito, and medians are indicated by the line. Sample value distributions were compared using the Mann-Whitney test. Pie charts represent the prevalence of *Plasmodium* sporozoite infection in *Wolbachia*-infected and uninfected samples. The prevalence was compared using the  $\chi^2$  test ( $n$  = number of samples).  $**P < 0.01$ .



**Table S1. Number of mosquitoes collected in 2010 from six Malian villages and the number of samples positive for anti-CSP ELISAs from head-thorax mosquito homogenates**

| Location                | <i>Plasmodium</i> + | Total | <i>Plasmodium</i> prevalence |
|-------------------------|---------------------|-------|------------------------------|
| Kenieroba               | 46                  | 3,788 | 1.21                         |
| Fourda                  | 5                   | 851   | 0.58                         |
| Dangassa                | 89                  | 3,280 | 2.71                         |
| Dangassa-somonosso      | 6                   | 475   | 1.26                         |
| Niaganabougou           | 51                  | 4,812 | 1.06                         |
| Niaganabougou-somonosso | 8                   | 1,815 | 0.44                         |

**Table S2. Primer sequences used for PCR amplifications**

| Primer      | Forward primer          | Reverse primer         |
|-------------|-------------------------|------------------------|
| W16S-Spec   | CATACCTATTCGAAGGGATAG   | AGCTTCGAGTGAAACCAATTC  |
| W16S-Nested | GAAGGGATAGGGTCGGTTCG    | CAATTCCTGGCGTGACG      |
| W16S-WE     | CAGACGGGTGAGTAATGYATAG  | TATCACTGGCAGTTTCCTAAAG |
| W16S-qPCR   | CATACCTATTCGAAGGGATAG   | TTGCGGGACTTAACCCAACA   |
| gatB        | GAKTTAAAYCGYGCAGGBGTT   | TGGYAAATCRGGYAAAAGATGA |
| coxA        | TTGGRGCRATYAACCTTATAG   | CTAAAGACTTTKACRCCAGT   |
| hcpA        | GAAATARCAGTTGCTGCAAA    | GAAAGTYRAGCAAGYCTCTG   |
| ftsZ        | ATYATGGARCATATAAARGATAG | TCRAGYAATGGATTRGATAT   |
| fbpA        | GCTGCTCCRCTTGGYWTGAT    | CCRCCAGARAAAAYACTATTC  |
| S7          | AGAACCAGCAGACCACCATC    | GCTGCAAACCTCGGCTATTC   |
| P28S        | GTGGCCTATCGATCCTTTA     | GCGTCCCAATGATAGGAAGA   |

**Table S3. *w*Anga-Mali sequence homology to specific regions of the *coxA*, *hcpA*, and *fbpA* genes**

| Gene | <i>Wolbachias</i> , % | <i>A. phagocytophilum</i> , % | <i>R. japonica</i> , % | <i>E. chaffeensis</i> , % |
|------|-----------------------|-------------------------------|------------------------|---------------------------|
| hcpA | 91                    | 55                            | 46                     | 56                        |
| fbpA | 93                    | 59                            | —                      | 65                        |
| coxA | 93                    | 73                            | 70                     | 74                        |

These sequences are used to classify *Wolbachia* strains using the multilocus sequence typing (MLST) scheme, a universal genotyping tool for *Wolbachia* (*coxA*, cytochrome *c* oxidase, subunit I; *fbpA*, fructose-bisphosphate aldolase; *hcpA*, conserved hypothetical protein;). Different *Wolbachia* strains that infect other hosts have the highest nucleotide sequenced homology to these genes in *w*Anga-Mali [*Wolbachia* from *Megalothorax incertus* for *hcpA* (91%); *Brugia pahangi* for *fbpA* (93%); and *Thalassaphorura houtanensis* for *coxA* (93%)]. The sequence homology to other Rickettsiales is lower and is indicated in the table. Sequence comparisons were done at the amino acid levels (blastx) using BLAST/NCBI/NIH.
